# Supplementary material for: Systematic validation and assessment of immunohistochemical markers for central nervous system pathology in cetaceans, with emphasis on auditory pathways
Source: PubMed Central journal article supplement (PMC9159615; doi:10.1371/journal.pone.0269090), 2022-06-01
Supplement: pone.0269090.s008.pdf [file pone.0269090.s008.pdf]

|   |    | Non-parametric                                                                                                                                                                                                                                                                                                                                                             | <i>p</i>                                                              | Parametric                                                                                                                                                                                                                                                                                | <i>p</i>               |
|---|----|----------------------------------------------------------------------------------------------------------------------------------------------------------------------------------------------------------------------------------------------------------------------------------------------------------------------------------------------------------------------------|-----------------------------------------------------------------------|-------------------------------------------------------------------------------------------------------------------------------------------------------------------------------------------------------------------------------------------------------------------------------------------|------------------------|
| A | IC | <ul style="list-style-type: none"> <li>Apaf1 astrocyte cytoplasmic H:U</li> <li>Apaf1 neuron cytoplasmic C:U/H</li> <li>Bcl2 neuron cytoplasmic C:U</li> </ul> Tendency: <ul style="list-style-type: none"> <li>bAPP neuron nuclear</li> <li>NF200 neuron cytoskeletal</li> </ul>                                                                                          | 0.026 Bf<br>Bf<br>none<br><br>0.0628<br>0.0780                        | <ul style="list-style-type: none"> <li><b>Apaf1 astrocyte cytoplasmic H:U</b></li> <li>Apaf1 neuron cytoplasmic C:U/H</li> <li>Bcl2 neuron cytoplasmic C:U</li> <li>bAPP neuron nuclear C:H</li> </ul>                                                                                    | <b>0.0068</b>          |
|   | CN | <ul style="list-style-type: none"> <li>Apaf1 neuron cytoplasmic C:U</li> <li>bAPP neuron nuclear C:H</li> <li>bAPP astrocyte cytoplasmic C:U</li> </ul>                                                                                                                                                                                                                    | Bf<br>Bf<br>Bf                                                        | <ul style="list-style-type: none"> <li>Apaf1 neuron cytoplasmic C:U</li> <li>Bcl2 neuron cytoplasmic C:H</li> <li>bAPP astrocyte cytoplasmic C:U</li> </ul>                                                                                                                               |                        |
| B | IC | <ul style="list-style-type: none"> <li><b>DGKz neuron nucleoli H:U</b></li> <li>DGKz neuron nucleoli C:H/U</li> <li>Apaf1 neuron cytoplasmic C:U/H</li> <li>Bcl2 neuron cytoplasmic C:U</li> </ul> Tendency: <ul style="list-style-type: none"> <li><b>Apaf1 astrocyte cytoplasmic H:U</b></li> </ul>                                                                      | None<br>Bf<br>Bf<br>Bf<br><br>None                                    | <ul style="list-style-type: none"> <li>DGKz neuron nucleoli C:U</li> <li><b>Apaf1 astrocyte cytoplasm H:U</b></li> <li>Apaf1 neuron cytoplasm C:U/H</li> <li>bAPP neuron nuclear C:U/H</li> <li>Bcl2 neuron cytoplasmic C:U/H</li> </ul>                                                  | <b>0.0067</b>          |
|   | CN | <ul style="list-style-type: none"> <li>Apaf1 neuron cytoplasmic C:U/H</li> <li>bAPP neuron nuclear C:U/H</li> <li>bAPP astrocyte cytoplasmic C:U/H</li> </ul>                                                                                                                                                                                                              | Bf<br>Bf<br>Bf                                                        | <ul style="list-style-type: none"> <li>Apaf1 astrocyte cytoplasmic C:U/H</li> <li>Apaf1 neuron cytoplasmic C:U/H</li> </ul>                                                                                                                                                               |                        |
| C | IC | <ul style="list-style-type: none"> <li><b>DGKz neuron nucleoli Y:O</b></li> <li>Apaf1 neuron cytoplasmic C:O&gt;Y</li> <li>Bcl2 neuron cytoplasmic C:O</li> <li>bAPP astrocyte cytoplasmic C:O</li> <li>bAPP neuron nuclear C:O</li> </ul> Tendency: <ul style="list-style-type: none"> <li><b>DGKz neuron cytoplasmic Y:O</b></li> <li>bAPP neuron nuclear Y:O</li> </ul> | <b>0.0096 Bf</b><br>Bf<br>Bf<br>Bf<br>None<br><br>0.0596<br>0.06 none | <ul style="list-style-type: none"> <li><b>DGKz neuron nucleoli Y:O</b></li> <li>DGKz neuron nucleoli C:O</li> <li>Apaf1 neuron cytoplasmic C:O&gt;Y</li> <li>Bcl2 neuron cytoplasmic C:O&gt;Y</li> <li>bAPP neuron nuclear C:O</li> <li>bAPP astrocyte cytoplasmic C:O</li> </ul>         | <b>0.0018</b><br>0.002 |
|   | CN | <ul style="list-style-type: none"> <li>Apaf1 neuron cytoplasmic C:O</li> <li>bAPP neuron nuclear C:Y</li> <li>bAPP neuron nuclear C:Y&gt;O</li> <li>bAPP astrocyte cytoplasmic C:Y</li> </ul> Tendency: <ul style="list-style-type: none"> <li>DGKz neuron nucleoli</li> <li>Apaf1 neuron cytoplasmic C:Y</li> <li>Bcl2 neuron cytoplasmic</li> </ul>                      | None<br>Bf<br>None<br>Bf<br><br>0.0751<br><br>0.0694                  | <ul style="list-style-type: none"> <li>Apaf1 neuron cytoplasmic C:O</li> <li>Bcl2 neuron cytoplasmic C:Y</li> <li>bAPP neuron nuclear C:Y</li> <li>bAPP astrocyte cytoplasmic C:Y&gt;O</li> </ul> Tendency: <ul style="list-style-type: none"> <li><b>DGKz neuron nucleoli</b></li> </ul> | <b>0.0786</b>          |

**Supplementary Table 1:** Results of the statistical comparisons of groups made according to A) morphopathological findings in haematoxylin-eosin stained sections, B) immunohistochemical findings C) age. In gray—results that do not fit into the parametric/non-parametric category according to results of the Shapiro-Wilks and/or Levene’s tests. If the group differences persist in post-hoc analyses, level of adjustment for  $\alpha$ -error are documented. Bf—Bonferroni adjustment for  $\alpha$ -error.
