# Supplementary material for: Systematic validation and assessment of immunohistochemical markers for central nervous system pathology in cetaceans, with emphasis on auditory pathways
Source: PubMed Central journal article supplement (PMC9159615; doi:10.1371/journal.pone.0269090), 2022-06-01
Supplement: pone.0269090.s009.pdf [file pone.0269090.s009.pdf]

| ID  | Sex | Body length (cm) | Full histopathological findings in haematoxylin-eosin stained central nervous system tissues                                                                                                                                                                                                                                | Probable cause of death                                                                                                                            |
|-----|-----|------------------|-----------------------------------------------------------------------------------------------------------------------------------------------------------------------------------------------------------------------------------------------------------------------------------------------------------------------------|----------------------------------------------------------------------------------------------------------------------------------------------------|
| 146 | M   | 226              | Mild neuronal degeneration and necrosis, perivascular edema and congestion                                                                                                                                                                                                                                                  | Hypovolemic shock                                                                                                                                  |
| 20  | F   | NA               | Mild congestion, perivascular edema and superficial cortical spongiosis                                                                                                                                                                                                                                                     | Could not be determined                                                                                                                            |
| 89  | M   | NA               | Mild neuronal degeneration and necrosis. Mild diffuse spongiosis                                                                                                                                                                                                                                                            | Shock and metabolic acidosis                                                                                                                       |
| 139 | M   | 268              | Mild neuronal degeneration and necrosis                                                                                                                                                                                                                                                                                     | Hypovolemic shock and hepatic necrosis                                                                                                             |
| 159 | M   | 328              | Mild multifocal spongiosis in white matter (WM) and superficial cortex, mild vasculitis, astrocytosis and satellitosis. Multifocal presence of gemistocytes in WM, multifocal neuronal necrosis. Multifocal presence of lipofuscin in Purkinje neurons                                                                      | Septic shock                                                                                                                                       |
| 319 | M   | 310              | Multifocal lymphohistiocytic spinal cord pachymeningitis, with presence of corpora amylacea. Presence of lipofuscin in neurons and spongiosis of the WM and superficial cortical layers. Intravascular neutrophil margination and clotting. Focal evidence of few shrunken, hypereosinophilic pyramidal neurons             | Septic shock                                                                                                                                       |
| 344 | M   | 195              | Diffuse, moderate-to-severe congestion                                                                                                                                                                                                                                                                                      | Could not be determined                                                                                                                            |
| 192 | F   | 240              | No abnormality detected                                                                                                                                                                                                                                                                                                     | Could not be determined                                                                                                                            |
| 196 | M   | 300              | Moderate chronic multifocal meningoencephalomyelitis with associated multifocal demyelination and non-suppurative vasculitis. Multifocal presence of glial nodes with isolated <i>T. gondii</i> cysts                                                                                                                       | Hepatic insufficiency, parasitic encephalitis and enteritis                                                                                        |
| 95  | F   | 285              | Severe multifocal vasogenic edema, moderate astrocytosis and congestion. Mild perivascular cuffing and multifocal coalescing neuronal necrosis. Multifocal microhemorrhages in IC                                                                                                                                           | Stranding pathology, with a concomitant severe, cholesteatoma-like lesion on the left occipital cortex                                             |
| 107 | M   | 250              | Multifocally few necrotic cerebellar Purkinje neurons. Mild diffuse cerebral spongiosis. Mild satellitosis and multifocal perivascular and meningeal lymphocytic infiltration, with presence of glial nodes                                                                                                                 | Respiratory insufficiency due to severe pulmonary edema and mycotic pneumonia. Moderate diffuse edema and multifocal mild vasculitis in the brain. |
| 133 | F   | 248              | Mild diffuse spongiosis and congestion, mild focal perivascular cuffing and astrocytosis. Mild multifocal neuronal degeneration in cortex. Multifocal necrosis of Purkinje neurons                                                                                                                                          | Cardiovascular shock, necrotic enteritis                                                                                                           |
| 142 | F   | 256              | Multifocal necrotic neurons with moderate satellitosis, astrocytosis, gliosis and perivascular cuffing. Multifocal presence of glial nodes with occasional <i>T. gondii</i> cysts at the center                                                                                                                             | Septic shock following systemic mycosis and cerebral toxoplasmosis                                                                                 |
| 165 | M   | 280              | Multifocal necrotic neurons with moderate satellitosis, astrocytosis and perivascular cuffing. Multifocal presence of glial nodes with occasional <i>T. gondii</i> cysts at the center                                                                                                                                      | Septic shock following systemic and cerebral toxoplasmosis                                                                                         |
| 201 | M   | 297              | Multifocal to coalescing severe chronic non-suppurative meningitis and moderate to severe vasculitis with lymphohistiocytic infiltrates, vascular fibrosis, multifocal foci of mild to moderate astrocytosis, neuronal necrosis and satellitosis. Focal cortical presence of protozoan parasitic cyst. Moderate congestion. | Septic shock, severe monolateral pneumonia, morbilliviral infection                                                                                |
| 203 | M   | 284              | Mild focal satellitosis, mild congestion, and loss of cellular detail                                                                                                                                                                                                                                                       | Cardiovascular shock                                                                                                                               |
| 114 | M   | NA               | Mild multifocal astrocytosis and astrogliosis, with mild-to-moderate diffuse congestion. Mild multifocal neuronal necrosis                                                                                                                                                                                                  | Meconium aspiration syndrome                                                                                                                       |
| 144 | M   | NA               | Mild multifocal neuronal necrosis                                                                                                                                                                                                                                                                                           | Meconium aspiration syndrome                                                                                                                       |
| 145 | M   | 118              | Mild multifocal neuronal necrosis                                                                                                                                                                                                                                                                                           | Meconium aspiration syndrome                                                                                                                       |
| 343 | F   | 95.5             | Mild multifocal neuronal necrosis                                                                                                                                                                                                                                                                                           | Meconium aspiration syndrome                                                                                                                       |

**Supplementary Table S2:** Summary of the ID, sex, body length, full histopathological findings of the CNS, and the most probable cause of death of the dolphins included in this study. **C**—cal. **M**—male; **F**—female.
